# Supplementary material
Source: bioRxiv or medRxiv preprint supplement (https://www.biorxiv.org/highwire/filestream/6027/field_highwire_adjunct_files/9/022889-6.pdf)

**a**

|                | 1   | 2   | 3  | 4  | 5   | 6  |
|----------------|-----|-----|----|----|-----|----|
| Australia      | 0   | 0   | 0  | 10 | 0   | 0  |
| Borneo         | 0   | 73  | 0  | 0  | 0   | 0  |
| Caucasus       | 0   | 0   | 0  | 0  | 42  | 0  |
| Central_Asia   | 0   | 23  | 0  | 0  | 0   | 0  |
| East_Africa    | 46  | 0   | 0  | 0  | 0   | 0  |
| East_Asia      | 0   | 188 | 0  | 0  | 0   | 0  |
| East_Indonesia | 0   | 3   | 7  | 0  | 0   | 0  |
| Europe         | 0   | 0   | 0  | 0  | 166 | 0  |
| Fiji           | 0   | 0   | 24 | 0  | 0   | 0  |
| Jehai          | 0   | 8   | 0  | 0  | 0   | 0  |
| Malaysia       | 0   | 10  | 0  | 0  | 0   | 0  |
| Mamanwa        | 0   | 11  | 0  | 0  | 0   | 0  |
| Moluccas       | 0   | 0   | 10 | 0  | 0   | 0  |
| New_Guinea     | 0   | 0   | 0  | 27 | 0   | 0  |
| North_India    | 0   | 0   | 0  | 0  | 0   | 25 |
| Onge           | 0   | 0   | 0  | 0  | 0   | 9  |
| Philippine     | 0   | 16  | 0  | 0  | 0   | 0  |
| Polynesia      | 0   | 0   | 44 | 0  | 0   | 0  |
| South_Africa   | 37  | 0   | 0  | 0  | 0   | 0  |
| South_Asia     | 0   | 35  | 0  | 0  | 0   | 0  |
| South_India    | 0   | 0   | 0  | 0  | 0   | 98 |
| Sumatra        | 0   | 20  | 0  | 0  | 0   | 0  |
| West_Africa    | 160 | 0   | 0  | 0  | 0   | 0  |
| West_Asia      | 0   | 0   | 0  | 0  | 8   | 30 |

**b**

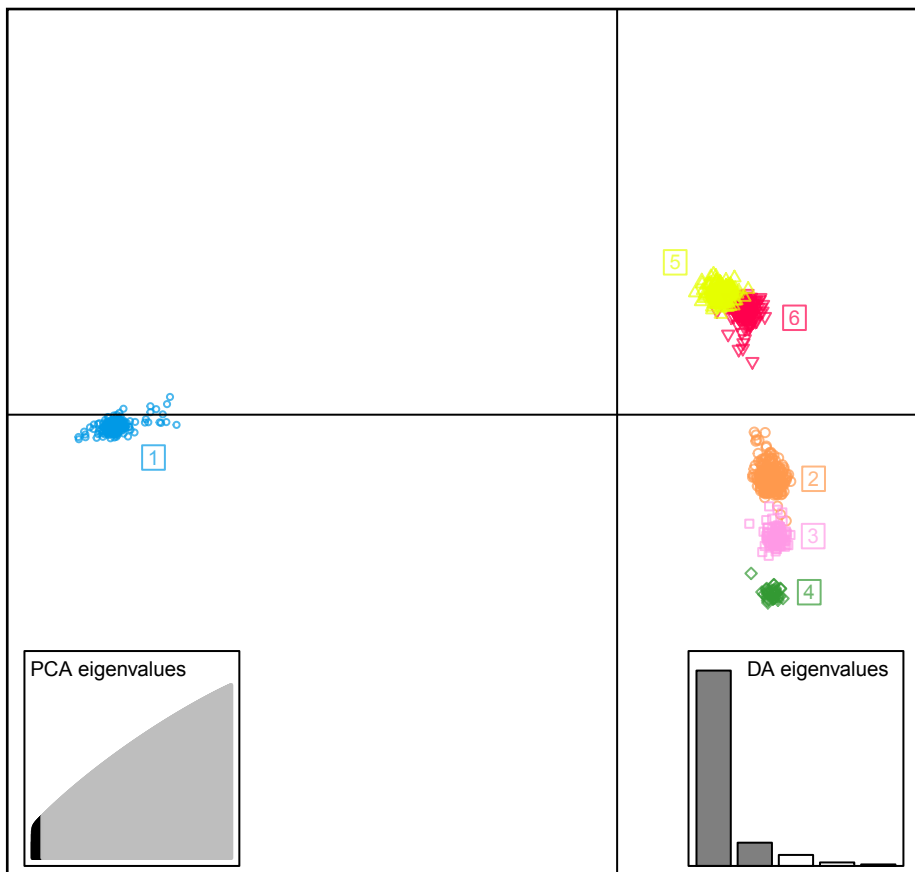

Supplement: Supplementary file [file 022889-6.pdf]
